# Supplementary material
Source: bioRxiv or medRxiv preprint supplement (https://www.biorxiv.org/highwire/filestream/119376/field_highwire_adjunct_files/1/348888-2.pdf)
Supplement: Supplementary file [file 348888-2.pdf]

Table 1: Epigenetic drugs and concentration.

| <b>Compound</b> | <b>Concentration<br/>(<math>\mu</math>M)</b> |
|-----------------|----------------------------------------------|
| CAY10603        | 10                                           |
| AT9283          | 10                                           |
| DZNep           | 10                                           |
| RG2833          | 10                                           |
| Resminostat     | 10                                           |
| Nexturastat-A   | 30                                           |
| Cerdulatinib    | 3                                            |
| OTX015          | 10                                           |
| OG-L002         | 30                                           |
| Olaparib        | 10                                           |
| RG108           | 30                                           |
| A-966492        | 10                                           |
| I-BET-762       | 10                                           |
| GSK-LSD1-2HCl   | 10                                           |
| Bromosporine    | 10                                           |
| EPZ-6438        | 0.1                                          |
| Procainamide    | 30                                           |
| OF-1            | 30                                           |
| Decitabine      | 10                                           |
| LMK-235         | 10                                           |
| GSK1324726A     | 10                                           |
| Selisistat      | 10                                           |

Table 2: Primary antibodies.

| <b>Antigen</b> | <b>Host</b> | <b>Dilution</b> | <b>Brand</b>   | <b>Catalogue Number</b> |
|----------------|-------------|-----------------|----------------|-------------------------|
| H3K9me3        | rb          | 1:250           | Active Motif   | 39765                   |
| H3K4me1        | ms          | 1:250           | Active Motif   | 39635                   |
| H3K27me3       | ms          | 1:250           | Active Motif   | 61017                   |
| H3K27ac        | rb          | 1:250           | Active Motif   | 39133                   |
| Sox2           | ms          | 1:400           | R&D Systems    | MAB2018                 |
| Sox2           | gt          | 1:250           | R&D Systems    | AF2018                  |
| Sall2          | Rb          | 1:250           | Bethyl         | A303-208A               |
| Brn2           | gt          | 1:250           | Santa Cruz     | sc-6029                 |
| Olig2          | rb          | 1:500           | Millipore      | AB9610                  |
| GFAP           | rb          | 1:500           | Millipore      | AB5804                  |
| Oct4           | rb          | 1:200           | Cell Signaling | 2840P                   |
